# Supplementary material for: Chemometric study on the effect of cooking on bioactive compounds in tomato pomace enriched sauces
Source: Springer Nature journal article supplement (doi:10.1038/s41538-024-00300-y), 2024-09-02
Supplement: MOESM1 [file 41538_2024_300_MOESM1_ESM.pdf]

**Chemometric study on the effect of cooking on bioactive compounds in tomato pomace  
enriched sauces**

Johana González-Coria<sup>1,2</sup>, Camilla Mesirca-Prevedello,<sup>3,4</sup> Julián Lozano-Castellón<sup>2,5,6</sup>, Enrico Casadei<sup>3,4</sup>, Enrico Valli<sup>3,4</sup>, Anallely López-Yerena<sup>2,5</sup>, Carolina Jaime-Rodríguez<sup>1,2</sup>, Diana Pinto<sup>7</sup>, Montse Illan<sup>5</sup>, Xavier Torrado<sup>5</sup>, Joan Romanyà<sup>1,2,6</sup>, Anna Vallverdú-Queralt<sup>2,5,6</sup>, Alessandra Bendini<sup>3,4,\*</sup>, Rosa M. Lamuela-Raventós<sup>2,5,6</sup>, Maria Pérez<sup>2,5,6,\*</sup>

<sup>1</sup>Department of Biology, Health, and the Environment, Faculty of Pharmacy and Food Sciences, University of Barcelona, 08028 Barcelona, Spain.

<sup>2</sup>Institute of Nutrition and Food Safety (INSA-UB), University of Barcelona, Barcelona, Spain.

<sup>3</sup>Department of Agricultural and Food Sciences, Alma Mater Studiorum—Università di Bologna, 47521 Cesena, Italy

<sup>4</sup>Interdepartmental Centre for Industrial Agrofood Research, Alma Mater Studiorum—Università di Bologna, 47521 Cesena, Italy

<sup>5</sup>Polyphenol Research Group, Department of Nutrition, Food Science and Gastronomy, Faculty of Pharmacy and Food Sciences, University of Barcelona, 08028 Barcelona, Spain.

<sup>6</sup>CIBER Physiopathology of Obesity and Nutrition (CIBEROBN), Institute of Health Carlos III, 28029 Madrid, Spain.

<sup>7</sup>REQUIMTE/LAQV, Instituto Superior de Engenharia do Porto, Rua Dr. António Bernardino de Almeida, 4249-015 Porto, Portugal.

\*Corresponding Authors: E-mail address: [alessandra.bendini@unibo.it](mailto:alessandra.bendini@unibo.it), [mariaperez@ub.edu](mailto:mariaperez@ub.edu)

**Supplementary information 1**

**Table S1.** Characteristics of bioactive compounds detected in tomato sauces.

| Compound                                              | Neutral molecular formula                       | RT (min) | Accurate mass | Experimental mass | Error (mmu) | MS <sup>2</sup> ions (m/z)      |
|-------------------------------------------------------|-------------------------------------------------|----------|---------------|-------------------|-------------|---------------------------------|
| <b>Phenolic acids</b>                                 |                                                 |          |               |                   |             |                                 |
| <i>p</i> -Hydroxybenzaldehyde                         | C <sub>7</sub> H <sub>6</sub> O <sub>2</sub>    | 5.30     | 121.0295      | 121.0294          | 0.744       | 66.0682/93.0296                 |
| 4-hydroxybenzoic acid*                                | C <sub>7</sub> H <sub>6</sub> O <sub>3</sub>    | 4.13     | 137.0244      | 137.0242          | -0.227      | 930.339                         |
| 2,5-dihydroxybenzoic acid*                            | C <sub>7</sub> H <sub>6</sub> O <sub>4</sub>    | 4.19     | 153.0193      | 153.0190          | -0.322      | 109.0287                        |
| 2,6-dihydroxybenzoic acid*                            | C <sub>7</sub> H <sub>6</sub> O <sub>4</sub>    | 5.94     | 153.0193      | 153.0187          | -0.642      | 135.0079/109.0287               |
| 3,5-dihydroxybenzoic acid*                            | C <sub>7</sub> H <sub>6</sub> O <sub>4</sub>    | 2.42     | 153.0193      | 153.0191          | -0.242      | 109.0289                        |
| Dihydroxybenzoic acid- <i>O</i> -pentoside            | C <sub>12</sub> H <sub>14</sub> O <sub>8</sub>  | 4.46     | 285.0615      | 285.0610          | -0.631      | 153.0182                        |
| Protocatechuic acid                                   | C <sub>7</sub> H <sub>6</sub> O <sub>4</sub>    | 2.38     | 153.0193      | 153.0190          | -0.372      | 106.0288                        |
| Caffeic acid                                          | C <sub>9</sub> H <sub>8</sub> O <sub>4</sub>    | 5.97     | 179.0339      | 179.0348          | 0.9050      | 135.0444                        |
| Gentisic acid*                                        | C <sub>7</sub> H <sub>6</sub> O <sub>4</sub>    | 6.28     | 153.0193      | 153.0190          | -0.322      | 109.0288                        |
| Caffeoylmalic acid                                    | C <sub>13</sub> H <sub>12</sub> O <sub>8</sub>  | 8.67     | 295.0459      | 295.0450          | -0.991      | 133.0135                        |
| Homovanillic acid hexose I                            | C <sub>15</sub> H <sub>20</sub> O <sub>9</sub>  | 5.61     | 343.1034      | 343.1024          | -1.005      | 137.0600                        |
| Homovanillic acid hexose II                           | C <sub>15</sub> H <sub>20</sub> O <sub>9</sub>  | 5.93     | 343.1034      | 343.1028          | -0.675      | 137.0600                        |
| Homovanillic acid hexose III                          | C <sub>15</sub> H <sub>20</sub> O <sub>9</sub>  | 6.46     | 343.1034      | 343.1026          | -0.825      | 137.0600                        |
| <i>p</i> -Coumaric acid*                              | C <sub>9</sub> H <sub>8</sub> O <sub>3</sub>    | 8.18     | 163.0400      | 163.0397          | -0.317      | 119.0495                        |
| Coumaric acid- <i>O</i> -hexoside (I, II, III)        | C <sub>15</sub> H <sub>18</sub> O <sub>8</sub>  | 6.21     | 325.0928      | 325.0919          | -0.911      | 163.0392/ 145.0286              |
| Coumaroylquinic acid I                                | C <sub>16</sub> H <sub>18</sub> O <sub>8</sub>  | 7.75     | 337.0928      | 337.0920          | -0.911      | 191.0571                        |
| Coumaroylquinic acid II                               | C <sub>16</sub> H <sub>18</sub> O <sub>8</sub>  | 8.32     | 337.0928      | 337.0917          | -1.181      | 191.0571                        |
| Ferulic acid*                                         | C <sub>10</sub> H <sub>10</sub> O <sub>4</sub>  | 9.81     | 193.0506      | 193.0499          | -0.732      | 149.0599/178.0261               |
| Isoferulic acid                                       | C <sub>10</sub> H <sub>10</sub> O <sub>4</sub>  | 14.3     | 193.0506      | 193.0503          | -0.342      | 149.0600/121.0652               |
| Caffeoyl-hexose I (caffeic acid hexose)               | C <sub>15</sub> H <sub>18</sub> O <sub>9</sub>  | 4.38     | 341.0878      | 341.0873          | -0.525      | 179.0342                        |
| Caffeoyl-hexose II (caffeic acid hexose)              | C <sub>15</sub> H <sub>18</sub> O <sub>9</sub>  | 4.6      | 341.0878      | 341.0874          | -0.375      | 179.0342                        |
| Caffeoyl-hexose III (caffeic acid hexose)             | C <sub>15</sub> H <sub>18</sub> O <sub>9</sub>  | 5.18     | 341.0878      | 341.0872          | -0.645      | 179.0342                        |
| Caffeoyl-hexose IV (caffeic acid hexose)              | C <sub>15</sub> H <sub>18</sub> O <sub>9</sub>  | 5.71     | 341.0878      | 341.0874          | -0.375      | 179.0342                        |
| 3-(2-Hydroxyphenyl) propanoic acid hexose             | C <sub>15</sub> H <sub>20</sub> O <sub>8</sub>  | 5.59     | 327.1085      | 327.1080          | -0.571      | 165.0550                        |
| 3,4-Dihydroxyhydrocinnamic acid                       | C <sub>9</sub> H <sub>10</sub> O <sub>4</sub>   | 5.55     | 181.0506      | 181.0503          | -0.312      | 137.0600                        |
| Sinapic acid- <i>O</i> -hexoside                      | C <sub>17</sub> H <sub>22</sub> O <sub>10</sub> | 6.61     | 385.1140      | 385.1130          | -1.040      | 223.0598                        |
| 1-Caffeoylquinic acid                                 | C <sub>16</sub> H <sub>18</sub> O <sub>9</sub>  | 5.85     | 353.0878      | 353.0870          | -0.765      | 191.0551                        |
| 3-Caffeoylquinic acid (chlorogenic acid)              | C <sub>16</sub> H <sub>18</sub> O <sub>9</sub>  | 6.59     | 353.0878      | 353.0873          | -0.495      | 191.0552/179.0342               |
| 5-Caffeoylquinic acid                                 | C <sub>16</sub> H <sub>18</sub> O <sub>9</sub>  | 7.84     | 353.0878      | 353.0868          | -0.985      | 191.0552/179.0342               |
| 3-(2-Hydroxy-4-methoxyphenyl) propanoic acid hexose   | C <sub>16</sub> H <sub>22</sub> O <sub>9</sub>  | 6.87     | 357.1191      | 357.1184          | -0.695      | 195.0655                        |
| Dicafeoylquinic acid I                                | C <sub>25</sub> H <sub>24</sub> O <sub>12</sub> | 14.68    | 515.1194      | 515.1191          | -0.359      | 353.0856                        |
| Dicafeoylquinic acid II                               | C <sub>25</sub> H <sub>24</sub> O <sub>12</sub> | 16.52    | 515.1194      | 515.1189          | -0.599      | 353.0856                        |
| Dicafeoylquinic acid III                              | C <sub>25</sub> H <sub>24</sub> O <sub>12</sub> | 18.59    | 515.1194      | 515.1187          | -0.849      | 353.0856                        |
| 3,4,5-Tricafeoylquinic acid                           | C <sub>34</sub> H <sub>30</sub> O <sub>15</sub> | 18.57    | 677.1511      | 677.1505          | -0.683      | 515.1172                        |
| <b>Flavonoids</b>                                     |                                                 |          |               |                   |             |                                 |
| Naringenin*                                           | C <sub>15</sub> H <sub>12</sub> O <sub>5</sub>  | 18.77    | 271.0611      | 271.0598          | -1.357      | 151.0028                        |
| Naringenin chalcone*                                  | C <sub>15</sub> H <sub>12</sub> O <sub>5</sub>  | 18.95    | 271.0611      | 271.0610          | -0.227      | 151.0026                        |
| Naringenin 7-glucoside*                               | C <sub>21</sub> H <sub>22</sub> O <sub>10</sub> | 14.76    | 433.1140      | 433.1129          | -1.140      | 271.0596                        |
| Naringenin chalcone hexose I                          | C <sub>21</sub> H <sub>22</sub> O <sub>10</sub> | 11.34    | 433.1140      | 433.1127          | -1.320      | 271.0598                        |
| Naringenin chalcone hexose II                         | C <sub>21</sub> H <sub>22</sub> O <sub>10</sub> | 12.02    | 433.1140      | 433.1133          | -0.680      | 271.0598                        |
| Naringenin dihexose I                                 | C <sub>27</sub> H <sub>32</sub> O <sub>15</sub> | 7.98     | 595.1668      | 595.1660          | -0.823      | 355.1008                        |
| Naringenin dihexose II                                | C <sub>27</sub> H <sub>32</sub> O <sub>15</sub> | 8.09     | 595.1668      | 595.1651          | -1.743      | 355.1008                        |
| <i>O</i> -acetylprurin                                | C <sub>23</sub> H <sub>24</sub> O <sub>11</sub> | 17.72    | 475.1245      | 475.1237          | -0.835      | 271.0597                        |
| Hesperetin*                                           | C <sub>16</sub> H <sub>14</sub> O <sub>6</sub>  | 19.1     | 301.0717      | 301.0716          | -0.171      | 286.0466/242.0571               |
| Eriodictyol                                           | C <sub>15</sub> H <sub>12</sub> O <sub>6</sub>  | 17.6     | 287.0561      | 287.0558          | -0.291      | 151.0029                        |
| Eriodictyol chalcone                                  | C <sub>15</sub> H <sub>12</sub> O <sub>6</sub>  | 16.18    | 287.0561      | 287.0555          | -0.571      | 151.0029                        |
| Homoeriodictyol                                       | C <sub>16</sub> H <sub>14</sub> O <sub>6</sub>  | 18.92    | 301.0717      | 301.0718          | 0.079       | 151/ 177/165/107/233            |
| Eriodictyol- <i>O</i> -hexoside                       | C <sub>21</sub> H <sub>22</sub> O <sub>11</sub> | 12.42    | 449.1089      | 449.1086          | -0.355      | 287.0547                        |
| Kaempferol*                                           | C <sub>15</sub> H <sub>10</sub> O <sub>6</sub>  | 19       | 285.0404      | 285.0400          | -0.481      | -                               |
| Dihydrokaempferol                                     | C <sub>15</sub> H <sub>12</sub> O <sub>6</sub>  | 18.19    | 287.0561      | 287.0558          | -0.321      | 151.0029                        |
| Kaempferol- <i>O</i> -hexoside                        | C <sub>21</sub> H <sub>20</sub> O <sub>11</sub> | 10.54    | 447.0932      | 447.0925          | -0.785      | -                               |
| Kaempferol- <i>O</i> -rutinoside                      | C <sub>27</sub> H <sub>30</sub> O <sub>15</sub> | 14.38    | 593.1511      | 593.1512          | -0.013      | 285.0389                        |
| Kaempferol- <i>O</i> -rutinoside- <i>O</i> -pentoside | C <sub>32</sub> H <sub>38</sub> O <sub>19</sub> | 13.06    | 725.1934      | 725.1927          | -0.762      | 593.1485/284.0308               |
| Kaempferol- <i>O</i> -rutinoside-hexoside             | C <sub>33</sub> H <sub>40</sub> O <sub>20</sub> | 9.22     | 755.2040      | 755.2034          | -0.647      | 593/285                         |
| Taxifolin*                                            | C <sub>15</sub> H <sub>12</sub> O <sub>7</sub>  | 10.94    | 303.0510      | 303.0504          | -0.576      | 285.0384                        |
| Isorhamnetin 3-sophoroside I                          | C <sub>28</sub> H <sub>32</sub> O <sub>17</sub> | 12.2     | 639.1566      | 639.1560          | -0.663      | 315.0510                        |
| Isorhamnetin 3-sophoroside II                         | C <sub>28</sub> H <sub>32</sub> O <sub>17</sub> | 12.83    | 639.1566      | 639.1561          | -0.603      | -                               |
| Quercetin <i>O</i> -hexoside                          | C <sub>21</sub> H <sub>20</sub> O <sub>12</sub> | 12.76    | 463.0881      | 463.0880          | -0.219      | 301.0336                        |
| Quercetin*                                            | C <sub>15</sub> H <sub>10</sub> O <sub>7</sub>  | 17.99    | 301.0353      | 301.0351          | -0.316      | 178.9981                        |
| Quercetin-3- <i>O</i> -rutinoside                     | C <sub>27</sub> H <sub>30</sub> O <sub>16</sub> | 12.58    | 609.1461      | 609.1466          | 0.502       | 301.0344/271.0239               |
| Quercetin- <i>O</i> -dihexoside                       | C <sub>27</sub> H <sub>30</sub> O <sub>17</sub> | 10.41    | 625.1410      | 625.1403          | -0.702      | 300.0260/271.0232/<br>343.0440/ |
| Quercitrin                                            | C <sub>21</sub> H <sub>20</sub> O <sub>11</sub> | 14.65    | 447.0932      | 447.0929          | -0.425      | 301.0341                        |
| Rutin pentoside                                       | C <sub>32</sub> H <sub>38</sub> O <sub>20</sub> | 11.66    | 741.1883      | 741.1890          | 0.593       | 300.0268/ 609.1446              |

|                                                                                   |                                                 |       |          |          |        |                            |
|-----------------------------------------------------------------------------------|-------------------------------------------------|-------|----------|----------|--------|----------------------------|
| Quercetin- <i>O</i> -rutinoside- <i>O</i> -hexoside                               | C <sub>33</sub> H <sub>40</sub> O <sub>21</sub> | 7.87  | 771.1989 | 771.1985 | -0.441 | 609.1445                   |
| Rutin*                                                                            | C <sub>27</sub> H <sub>30</sub> O <sub>16</sub> | 12.56 | 609.1461 | 609.1466 | 0.502  | 301.0335                   |
| Luteolincat                                                                       | C <sub>15</sub> H <sub>10</sub> O <sub>6</sub>  | 18.07 | 285.0394 | 285.0394 | -0.423 | 241.0491                   |
| Apigenin                                                                          | C <sub>15</sub> H <sub>10</sub> O <sub>5</sub>  | 18.86 | 269.0444 | 269.0453 | 0.322  | 225.0547                   |
| 2-Methyl-6-methylene-2-octene-1,8-diol-8- <i>O</i> -(2,6-diacetylglucopyranoside) | C <sub>20</sub> H <sub>32</sub> O <sub>9</sub>  | 13.8  | 415.1963 | 415.1969 | 0.601  | -                          |
| Apigenin acetylhexoside                                                           | C <sub>21</sub> H <sub>30</sub> O <sub>12</sub> | 14.95 | 473.1654 | 473.1660 | 0.597  | 431.1520                   |
| Phloridzin- <i>C</i> -diglycoside                                                 | C <sub>33</sub> H <sub>44</sub> O <sub>20</sub> | 11.06 | 759.2353 | 759.2341 | -1.247 | -                          |
| Phloretin- <i>C</i> -dihexoside                                                   | C <sub>27</sub> H <sub>34</sub> O <sub>15</sub> | 13.93 | 597.1813 | 597.1829 | 1.463  | 357.0962/387.1068/477.1386 |

\*Comparison with standard.

Supplementary information 2

Table S2. Model validation parameters.

| Model type | Factor            | R2X (cum) | R2Y (cum) | Q2 (cum) | p-value CV-ANOVA |
|------------|-------------------|-----------|-----------|----------|------------------|
| PCA        |                   |           |           |          |                  |
| PLS-DA     | TP-enrichment     | 0.638     | 0.993     | 0.988    | 0.000            |
| OPLS-DA    | Cooking technique | 0.756     | 0.869     | 0.746    | 1.64E-30         |
| OPLS-DA    | Temperature       | 0.790     | 0.963     | 0.870    | 1.04E-18         |
| OPLS-DA    | Time              | 0.796     | 0.887     | 0.643    | 1.61E-07         |

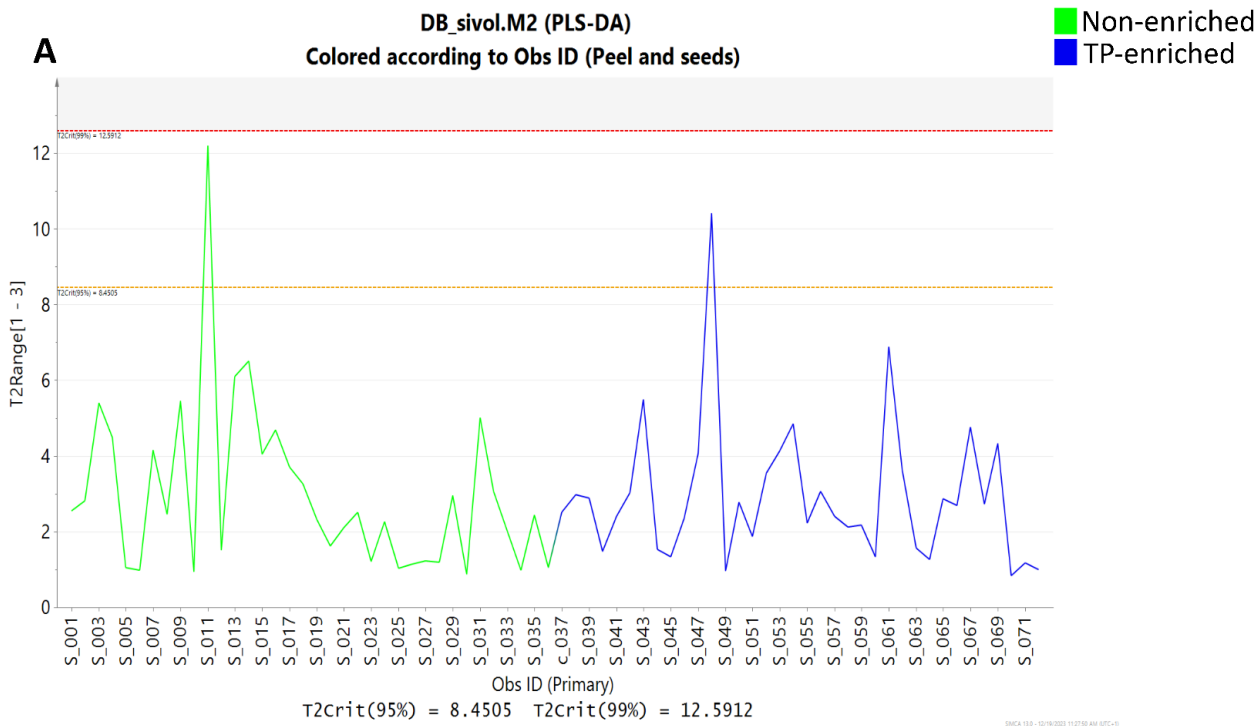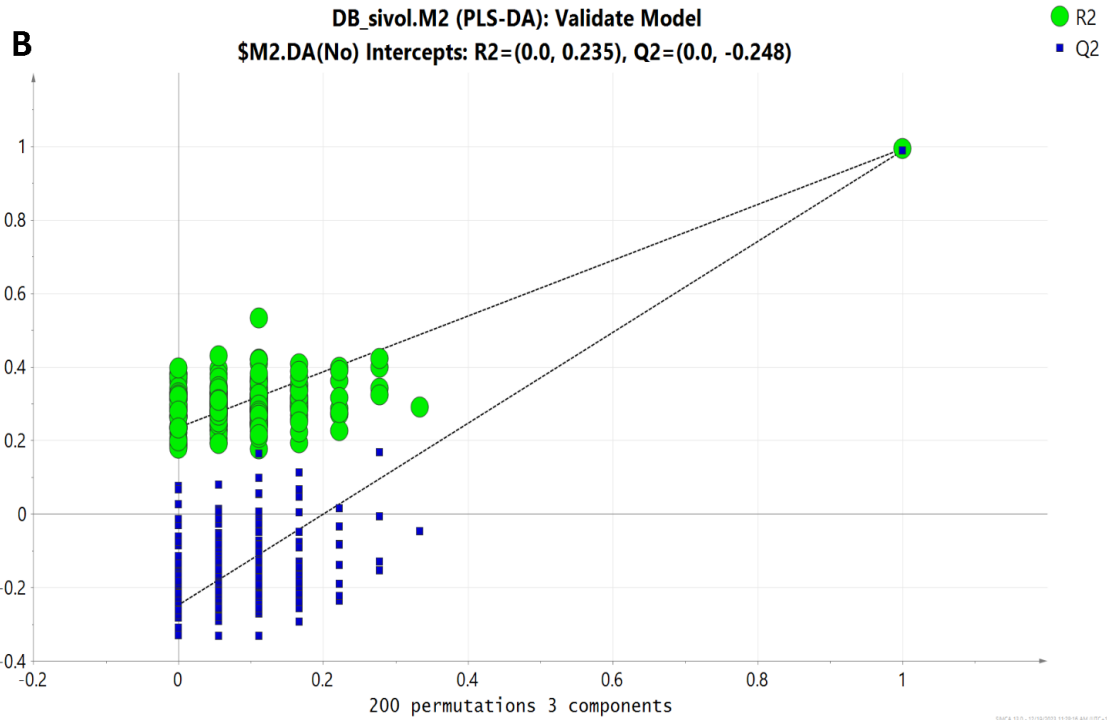

Figure S1. PLS-DA model using TP-enrichment as a factor A) Hotelling's T2, B) Residuals N-plot.

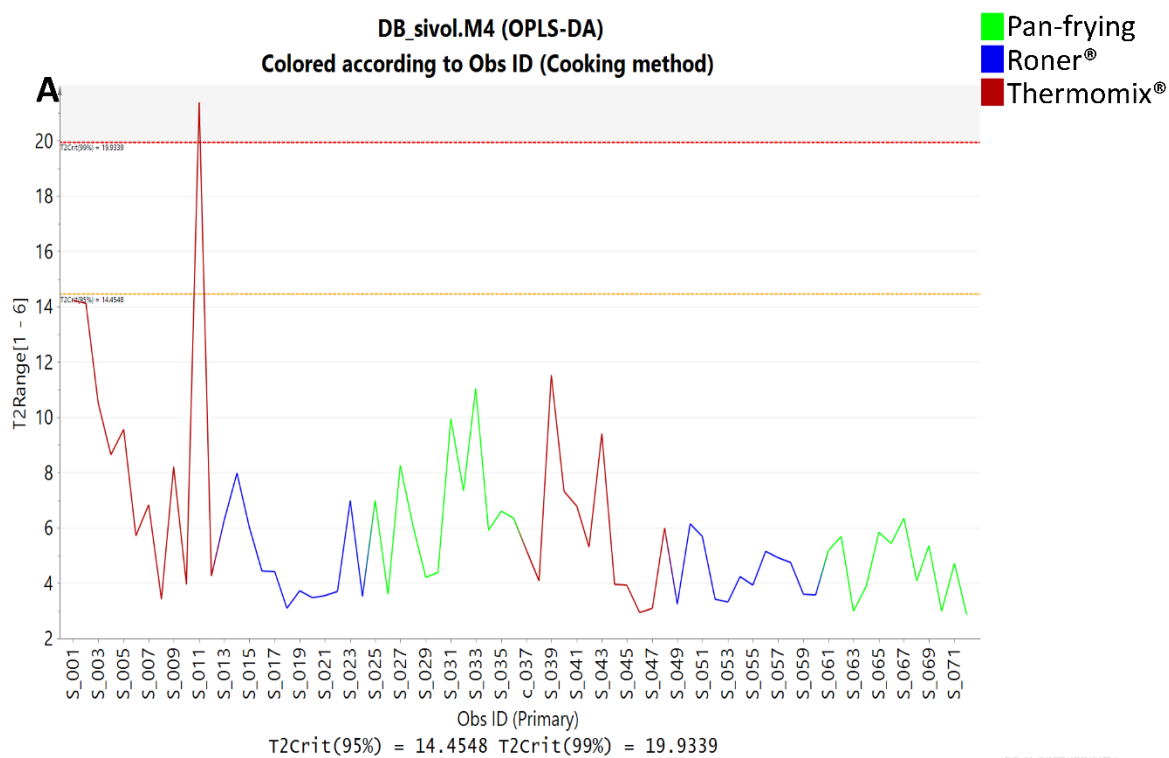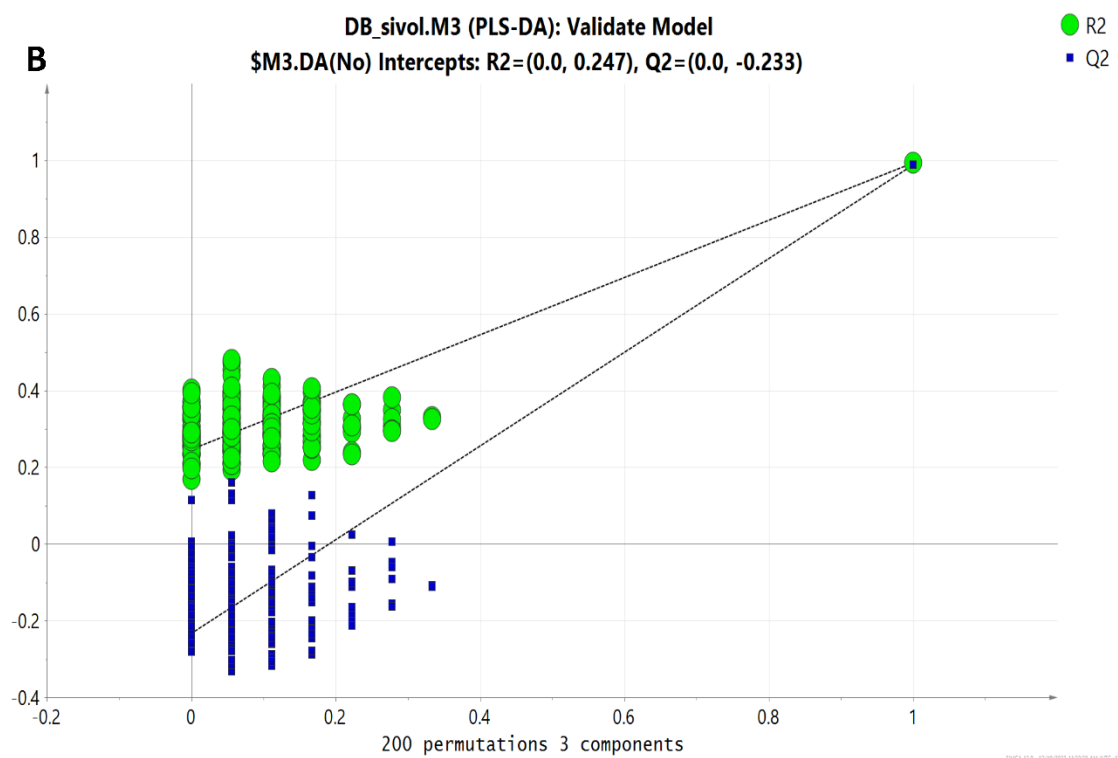

**Figure S2.** OPLS-DA model using cooking technique as a factor A) Hotelling's T2, B) Residuals N-plot.

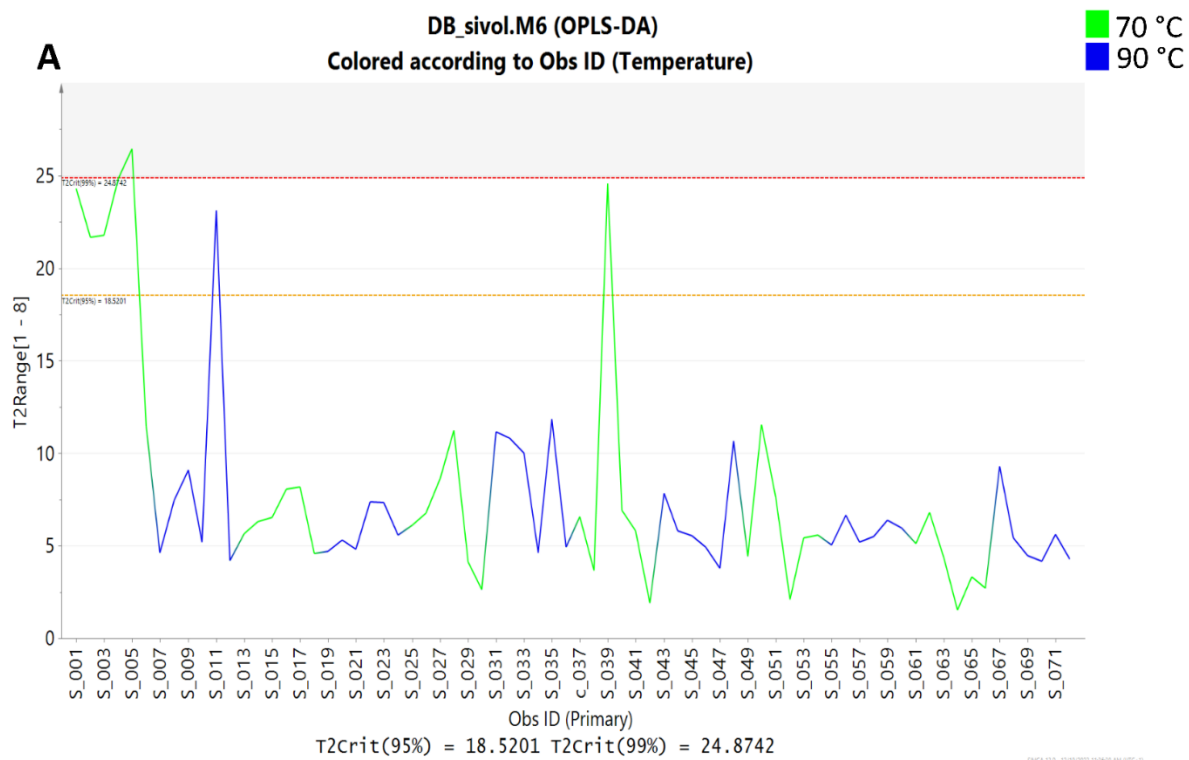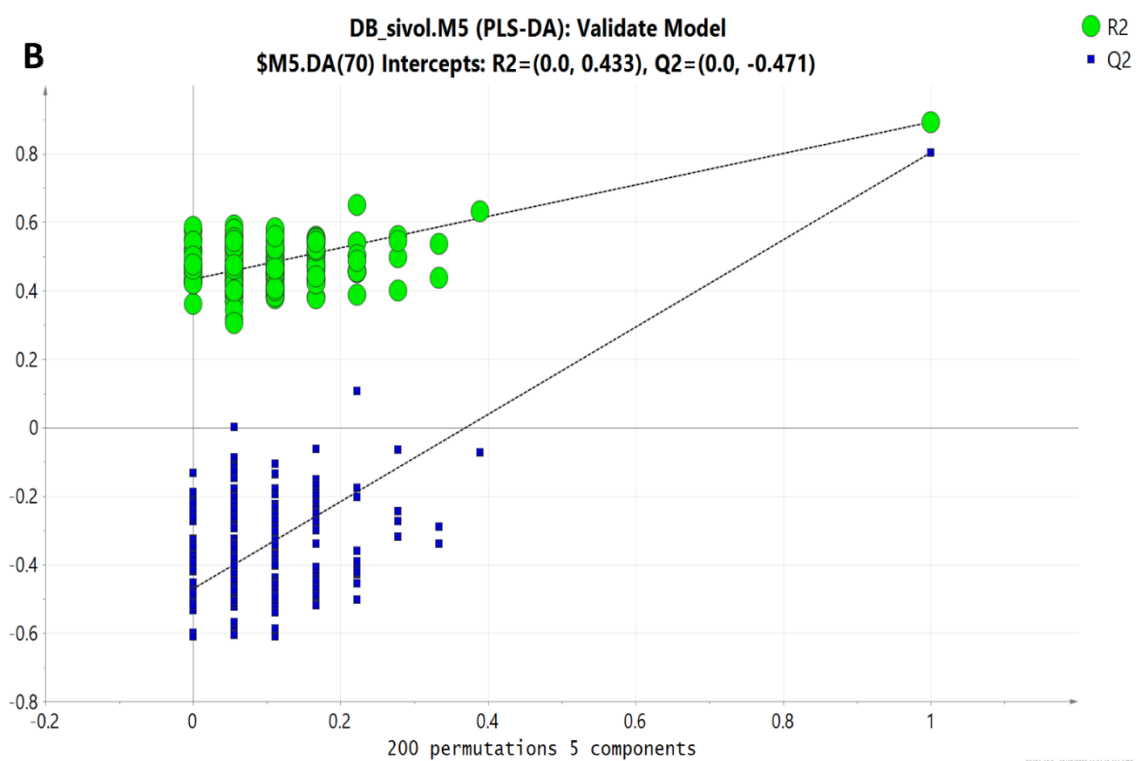

**Figure S3.** OPLS-DA model using temperature as a factor A) Hotelling's T2, B) Residuals N-plot.

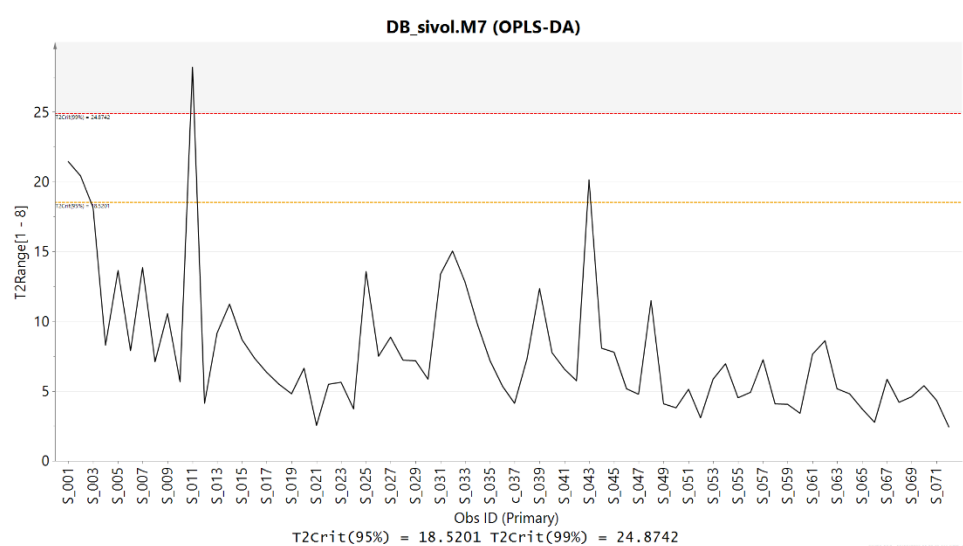

**Figure S4.** Hotelling's of the OPLS-DA model using time as a factor
